# Supplementary material for: Rapid mineralization of biogenic volatile organic compounds in temperate and Arctic soils
Source: Copernicus journal article supplement (doi:10.5194/bg-15-3591-2018), 2018-06-15
Supplement: Supplementary file 1 [file bg-15-3591-2018-supplement.zip]

Archive with 3 entries (3 files):
- Figure 3 data.xlsx
- bg-15-3591-2018-supplement-title-page.pdf
- Albers et al Supplementary.pdf
