# Supplementary material for: Rapid mineralization of biogenic volatile organic compounds in temperate and Arctic soils
Source: Copernicus journal article supplement (doi:10.5194/bg-15-3591-2018), 2018-06-15
Supplement: Supplementary file 1 [file bg-15-3591-2018-supplement.zip › bg-15-3591-2018-supplement-title-page.pdf]

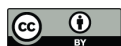

## *Supplement of*

# **Rapid mineralization of biogenic volatile organic compounds in temperate and Arctic soils**

**Christian Nyrop Albers et al.**

*Correspondence to:* Christian Nyrop Albers (cal@geus.dk)

- bg-15-3591-2018-supplement-title-page.pdf
- Albers et al Supplementary.pdf
- Figure 3 data.xlsx

The copyright of individual parts of the supplement might differ from the CC BY 4.0 License.
