# Supplementary material for: Rapid mineralization of biogenic volatile organic compounds in temperate and Arctic soils
Source: Copernicus journal article supplement (doi:10.5194/bg-15-3591-2018), 2018-06-15
Supplement: Supplementary file 1 [file bg-15-3591-2018-supplement.zip › Figure 3 data.xlsx]

## Sheet: Ark1
Benzaldehyde			Average (Accumulated CO2 of % added)								Standard deviation (accumulated CO2 of % added)
Soil type	Autoclaved?	Time (h):	0	2	6	24	48	72	144		0	2	6	24	48	72	144
Coniferous	No		0	27.1012	44.0913	52.4035	55.7244	56.6041	60.261		0	0.58314	1.36395	0.612791	0.405233	0.375581	0.286628
Coniferous	Yes		0	-0.00988372	0	0.00988372	0.0296512	0.0593023	0.0988372
Beech	No		0	26.8014	39.245	44.4141	48.5884	49.4021	52.611		0	2.54614	5.42237	4.14991	1.32228	1.22859	1.20816
Beech	Yes		0	0.00988372	0.0395349	0.00988372	0.0395349	0.00988372	-0.0494186
Arctic Heath	No		0	31.0553	44.0133	50.3416	53.5484	55.6087	59.1069		0	0.349485	0.754709	0.806379	0.830965	0.908344	0.963641
Arctic Heath	Yes		0	0.0491329	0.0491329	0.0589595	0.0687861	0.0687861	0.255491
Artctic Bare soil	No		0	24.1177	36.4829	46.3586	51.1212	53.4894	57.0008		0	0.654598	1.24174	1.42963	1.37226	1.32355	1.20501
Artctic Bare soil	Yes		0	-0.0294798	-0.0393064	-0.452023	-0.343931	-0.0884393	-0.137572
p-cymene			Average (Accumulated CO2 of % added)								Standard deviation (accumulated CO2 of % added)
Soil type	Autoclaved	Time (h):	0	2	6	24	48	72	144		0	2	6	24	48	72	144
Coniferous	No		0	20.8158	46.7952	64.1865	71.2532	73.9512	80.7768		0	1.97479	4.45147	3.88976	3.04958	2.79974	1.86745
Coniferous	Yes		0	0.0281924	0.0281924	0.0422886	0.0281924	0.0281924	0.0422886
Beech	No		0	0.888861	4.46319	24.5647	46.4984	55.7619	66.1317		0	0.0940224	0.196798	0.88191	2.16884	1.66037	0.611644
Beech	Yes		0	0	0	-0.0145798	-0.0291595	-0.0437393	-0.0728988
Arctic Heath	No		0	3.95572	16.3549	65.8967	78.966	83.0981	87.4163		0	0.26151	1.69184	3.60818	3.32448	3.41553	3.38731
Arctic Heath	Yes		0	0	-0.0104938	-0.0104938	-0.0209877	-0.0209877	-0.0314815
Artctic Bare soil	No		0	0.3699	1.45109	10.1708	25.8737	40.9644	48.1653		0	0.0590889	0.230342	1.0189	2.14773	3.20831	3.65806
Artctic Bare soil	Yes		0	0	0.011039	0.011039	0.0220779	0.0331169	0.0220779
Methanol			Average (Accumulated CO2 of % added)								Standard deviation (accumulated CO2 of % added)
Soil type	Autoclaved	Time (h):	0	2	6	24	48	72	144		0	2	6	24	48	72	144
Coniferous	No		0	75.9894	88.1921	91.7384	92.3915	92.5525	92.8745		0	3.043	2.71743	1.97331	1.65854	1.61692	1.58544
Coniferous	Yes		0	0.193182	0.165584	0.193182	0.262175	0.179383	0.234578
Beech	No		0	69.1085	81.8263	87.7873	89.641	89.8525	90.2113		0	5.02567	3.42971	2.11755	1.75348	1.77856	1.93813
Beech	Yes		0	0.165584	0.193182	0.455357	0.42776	0.482955	0.400162
Arctic Heath	No		0	78.9005	92.6464	96.7581	97.3152	97.4595	97.6799		0	0.227549	0.195591	0.717406	0.806284	0.814488	0.820735
Arctic Heath	Yes		0	0.324611	0.432815	0.516973	0.577086	0.45686	0.50495
Artctic Bare soil	No		0	49.7496	62.7221	75.454	81.1167	83.0042	85.0321		0	0.0597111	1.30846	1.43481	0.952194	0.892756	0.796423
Artctic Bare soil	Yes		0	0.156294	0.216407	0.276521	0.360679	0.216407	-0.144272
Chloroform			Average (Accumulated CO2 of % added)								Standard deviation (accumulated CO2 of % added)
Soil type	Autoclaved	Time (d):	0	1	3	6	13	21			0	1	3	6	13	21
Coniferous	No		0	4.81939	9.05642	16.2068	27.5082	35.7367			0	0.470963	0.29643	0.647901	0.930816	1.24659
Coniferous	Yes		0	-0.253731	-0.507463	0	0	0.507463
Beech	No		0	4.04625	9.03754	15.6652	24.5407	30.0551			0	0.637086	0.8709	1.17715	0.450154	0.435288
Beech	Yes		0	0.263158	-0.526316	0.263158	1.05263	1.57895
Arctic Heath	No		0	8.18249	16.4387	25.0009	37.3078	44.0409			0	0.378933	0.3108	0.999282	1.79063	1.64614
Arctic Heath	Yes		0	-0.235131	-0.470263	-0.470263	-0.705394	-0.940526
Artctic Bare soil	No		0	11.5705	25.0663	35.5949	44.2788	47.3356			0	0.935094	1.77584	2.00985	1.56139	1.05957
Artctic Bare soil	Yes		0	0.247453	-0.247453	-0.989811	-0.494905	-0.742358
Acetophenone			Average (Accumulated CO2 of % added)								Standard deviation (accumulated CO2 of % added)
Soil type	Autoclaved	Time (h):	0	2	6	24	48	72	144		0	2	6	24	48	72	144
Coniferous	No		0	3.95542	18.5336	34.1688	37.4284	39.3884	43.0655		0	0.35803	1.20026	0.26358	0.468137	0.51384	0.557812
Coniferous	Yes		0	0.0177638	0.0266458	0.0532915	0.0355277	0.0532915	0.0532915
Beech	No		0	5.28178	21.3817	35.0451	37.7097	39.0361	41.3513		0	0.0233121	0.272347	0.401972	0.708788	0.679839	0.671915
Beech	Yes		0	0.00888192	0	0.0355277	0	-0.0444096	-0.0710554
Arctic Heath	No		0	8.59918	22.1145	29.2657	31.851	33.6462	36.8763		0	0.161357	0.217501	0.202673	0.218703	0.251742	0.241459
Arctic Heath	Yes		0	0.0198366	0.0595099	0.0793466	0.0991832	0.138856	0.128938
Artctic Bare soil	No		0	4.61863	17.767	35.2233	41.085	43.8092	46.388		0	0.187022	0.345516	1.34344	0.659218	0.346243	0.23735
Artctic Bare soil	Yes		0	0.00991832	0.029755	0.00991832	0.00991832	-0.00991832	0.0396733
Geraniol			Average (Accumulated CO2 of % added)								Standard deviation (accumulated CO2 of % added)
Soil type	Autoclaved	Time (h):	0	2	6	24	48	72	144		0	2	6	24	48	72	144
Coniferous	No		0	2.99775	12.22	28.8853	36.0641	39.9691	46.1995		0	1.215	1.73525	0.141177	0.239647	0.363341	0.427966
Coniferous	Yes		0	0.00880829	0.00880829	0.0264249	0.0176166	0.0176166	0.0352332
Beech	No		0	7.04957	17.5314	30.8349	35.0687	37.7699	42.4794		0	0.822348	0.829799	0.239431	0.392889	0.442231	0.543995
Beech	Yes		0	0.00880829	0	0.00880829	0	0.00880829	0.0176166
Arctic Heath	No		0	8.64319	17.524	28.2754	33.9634	37.2995	42.2867		0	0.277658	0.23294	0.497613	0.567158	0.591526	0.602225
Arctic Heath	Yes		0	-0.0182796	-0.0274194	-0.00913978	-0.0182796	-0.00913978	0.00913978
Artctic Bare soil	No		0	4.55161	10.4102	20.0466	25.0278	27.8794	32.9124		0	0.172126	0.306512	0.38215	0.321008	0.171856	0.161613
Artctic Bare soil	Yes		0	0	0.0182796	0.0182796	0.0365591	0.0365591	0.0639785
